# Supplementary material for: Photoperiod Control of Plant Growth: Flowering Time Genes Beyond Flowering
Source: Front Plant Sci. 2022 Feb 9;12:805635. doi: 10.3389/fpls.2021.805635 (PMC8864088; doi:10.3389/fpls.2021.805635)
Supplement: Supplementary Table 1 — List of genes involved in the regulation of different developmental processes in response to photoperiod. [file Table_1.xlsx]

## Sheet: Hoja1
	Process	species	Gene	up or down	references
	hypocotyl elongation	Arabidopsis thaliana	PIF4	up	Huq and Quail, 2002;Nozue et al., 2007
	hypocotyl elongation	Arabidopsis thaliana	PIF5	up	Huq and Quail, 2002;Nozue et al., 2007
	hypocotyl elongation	Arabidopsis thaliana	CDF1	up	Martín et al., 2018
	hypocotyl elongation	Arabidopsis thaliana	CDF5	up	Martín et al., 2018
	hypocotyl elongation	Arabidopsis thaliana	YUC8	up	Martín et al., 2018
	hypocotyl elongation	Arabidopsis thaliana	PRR	up	Matsushika et al., 2000; Nakamichi et al., 2005a; 142 Nakamichi et al., 2005b; Nusinow et al., 2011
	hypocotyl elongation	Arabidopsis thaliana	CDF	down	Martín et al., 2018
	hypocotyl elongation	Arabidopsis thaliana	DELLA	down	De lucas et al., 2008; Feng et al., 2008; Davière et al., 2008)
	Stomata opening	Arabidopsis thaliana	CCA1	up (cycler)	Hassidim et al., 2017
	Stomata opening	Arabidopsis thaliana	FT	up	Kinoshita et al., 2011
	Stomata opening	Arabidopsis thaliana	TSF	up	Ando et al., 2013
	Stomata opening	Arabidopsis thaliana	SOC1	up	Aoki et al., 2019; Kimura et al., 2015
	Stomata opening	Arabidopsis thaliana	ELF3	down	Kinoshita et al., 2011
	Tuberization	Solanum tuberosum	StSP6A	up	Navarro et al., 2011
	Tuberization	Solanum tuberosum	St14-3-3s	up	Teo et al., 2016
	Tuberization	Solanum tuberosum	StFDL1	up	Teo et al., 2016
	Tuberization	Solanum tuberosum	StCOL1	down	Navarro et al., 2011; González-Schain et al., 2012
	Tuberization	Solanum tuberosum	StCOL2	down	Abelenda et al., 2016; Ramírez Gonzales et al. 2021)
	Tuberization	Solanum tuberosum	StCOL3	down	Abelenda et al., 2016; Ramírez Gonzales et al. 2021)
	Tuberization	Solanum tuberosum	StSP5G	down	Abelenda et al., 2016
	Tuberization	Solanum tuberosum	StCDF1	down	Kloosterman et al., 2013
	Tuberization	Solanum tuberosum	StGI	cycle	Kloosterman et al., 2013
	Tuberization	Solanum tuberosum	StFKF1	cycle	Kloosterman et al., 2013
	Tuberization	Solanum tuberosum	StPHYB	down	Jackson and Prat, 1996; Jackson et al., 1998
	Tuberization	Solanum tuberosum	StPHYF	down	Zhou et al., 2019
	Tuberization	Solanum tuberosum	StBEL5	up	Sharma 2016
	Tuberization	Solanum tuberosum	miR172	up	Martin et al., 2009
	Tuberization	Solanum tuberosum	RAP1	up	Martin et al., 2009
	Runner formation	Fragaria x ananassa	FvGA20ox4	up	Tenreira et al., 2017
	Runner formation	Fragaria x ananassa	FvRGA1	down	Caruana et al., 2018
	Runner formation	Fragaria x ananassa	FvCO	up	Rantanen et al., 2014; Kurokura et al., 2017
	Runner formation	Fragaria x ananassa	FvFT1	up	Andrés et al. 2013
	Runner formation	Fragaria x ananassa	FvSOC1	up	Andrés et al. 2013
	Flowering	Arabidopsis thaliana	CO	up	Putterill et al., 1995; Suárez-Lopez et al., 2001; Valverde et al., 2004
	Flowering	Arabidopsis thaliana	FT	up	Kardailsky et al., 1999; Kobayashi et al., 1999; Corbesier et al., 2007
	Flowering	Arabidopsis thaliana	TSF	up	Samach et al., 2000; Yamaguchi et al., 2005
	Flowering	Arabidopsis thaliana	SOC1	up	Simon et al., 1996; Samach et al., 2000; Moon et al., 2005; Yoo et al., 2005
	Flowering	Arabidopsis thaliana	AP1	up	Simon et al., 1996; Samach et al., 2000; Moon et al., 2005
	Flowering	Arabidopsis thaliana	GI	up	Imaizumi et al., 2005; Sawa et al., 2007b
	Flowering	Arabidopsis thaliana	FKF1	up	Imaizumi et al., 2005; Sawa et al., 2007b
	Flowering	Arabidopsis thaliana	CDFs	down	Yant et al., 2009; Kinoshita et al., 2020
	Flowering	Arabidopsis thaliana	ELFs	down	Yant et al., 2009; Kinoshita et al., 2020
	Flowering	Arabidopsis thaliana	TEMs	down	Castillejo and Pelaz, 2008; Osnato et al., 2012; Marín-González et al., 2015; Aguilar-Jaramillo et al., 2019
	Flowering	Arabidopsis thaliana	SVP	down	Hartmann et al., 2000; Fujiwara et al., 2008; Jang et al., 2009
	Flowering	Oryza sativa	Hd1 (AtCO homolog)	up	Yano et al.,2000; Izawa et al.,2002; Kojima et al., 2002
	Flowering	Oryza sativa	Hd3a (AtFT ortholog)	up	Tamaki et al.,2007; Komiya et al., 2008; Komiya et al.,2009
	Flowering	Oryza sativa	RFT (AtFT ortholog)	up	Tamaki et al.,2007; Komiya et al., 2008; Komiya et al.,2009
	Flowering	Oryza sativa	Ehd7	up	Doi et al.,2004; Itoh et al.,2010
	Flowering	Oryza sativa	Ghd7	down	Xue et al., 2008; Itoh et al.,2010
	Flowering	Zea mays	ZmCTT9 (OsGhd7 ortholog)	down	Guo et al.,2018
	Flowering	Zea mays	ZmCTT10 (OsGhd7 ortholog)	down	Guo et al., 2018
	Flowering	Zea mays	ZCN8 (AtFT ortholog)	up	Meng et al.,2011; Lazakis et al., 2011; Danilevskaya et al., 2011
	Flowering	Hordeum vulgare	Ppd-H1 (similar to AtPRR7)	up	Turner et al., 2005
	Flowering	Hordeum vulgare	HvFT1	up	Turner et al., 2005; Yan et al.,2006; Faure et al., 2007
	Flowering	Triticum aestivum	Ppd-A1 (HvPpd-H1 ortholog)	up	Guo et al., 2010; Würschum et al., 2018
	Flowering	Triticum aestivum	Ppd-B1 (HvPpd-H1 ortholog)	up	Guo et al.,2010; Würschum et al., 2018
	Flowering	Triticum aestivum	Ppd-D1 (HvPpd-H1 ortholog)	up	Guo et al.,2010; Würschum et al., 2018
	Flowering	Triticum aestivum	TaFT1	up	Yan et al., 2006
	Growth Cessation	Populus trichocarpa	PtFT2	down	Hsu et al., 2011
	Bud Development	Populus trichocarpa	PtFT1	up	Hsu et al., 2011
	Bud Development	Populus trichocarpa	FDL1 (poplar FD)	up	Ruttink et al., 2007
	Bud Development	Populus trichocarpa	LAP1 (AtAP1 like)	up	Ruttink et al., 2007
	Vegetative Growth	Populus trichocarpa	PtFT2	up	Hsu et al., 2011
	Growth Cessation	P. tremula x P. tremuloides	PttGI (AtGI paralog)	down	Ding et al., 2018
	Growth Cessation	P. tremula x P. tremuloides	PttGIL (AtGI paralog)	down	Ding et al., 2018
	Dormancy	Euphorbia esula	FT-like	down	Horvath et al., 2008
	Dormancy	Euphorbia esula	DAM genes (AtSVP like)	up	Horvath et al., 2008
	Male Reproductive Organs	Picea abies	PaFTL1	up	Gyllenstrand et al., 2007; Klintenäs et al., 2012
	Growth Cessation	Picea abies	PaFTL2	up	Gyllenstrand et al., 2007; Klintenäs et al., 2012
